# Supplementary material
Source: publisher figshare collection journal article supplement (https://tandf.figshare.com/ndownloader/files/14994494)
Supplement: Supplementary file 1 [file 14994494]

**Secondary Metabolites Produced by Grapevine Strains of *Lasiodiplodia theobromae* Grown at Two Different Temperatures**

Carina Félixa, Maria M. Salvatoreb, Marina DellaGrecab, Vanessa Ferreiraa, Ana S. Duartea,c, Francesco Salvatoreb, Daniele Navigliob, Monica Gallod, Artur Alvesa, Ana C. Estevesa,c, and Anna Andolfib*

aDepartment of Biology, CESAM, University of Aveiro, Campus Universitário de Santiago, 3810-193 Aveiro, Portugal; bDepartment of Chemical Sciences, University of Napoli Federico II, Complesso Universitario di Monte S’Angelo, via Cintia 4, 80126 Napoli, Italy; cUniversidade Católica Portuguesa, ICS-Viseu, Viseu, Portugal; dDepartment of Molecular Medicine and Medical Biotechnology, University of Napoli Federico II, via S. Pansini 5, 80131 Napoli, Italy

**Author to whom correspondence should be addressed*

Phone:0039-0812539179; E-mail:andolfinina.it

**EXTRACTION AND PURIFICATION OF FUNGAL METABOLITES**

***Metabolite purification of strain LA-SOL3 grown at 25 °C.****—­­­­*The freeze-dried culture filtrates (from 650 mL) were dissolved in 80 mL of pure water and extracted 3 times with an equal volume of EtOAc. The crude extracts were combined, dried with Na2SO4,and evaporated under reduced pressure originating a brown oil residue (LA-SOL3CE25, 120.3 mg).

This extract was fractionated by silica gel chromatography (CC) (30 x 1.5 cm) eluted with CHCl3/*i*-PrOH (9:1) to yield 7 fractions (A 4.6 mg, B 2.4 mg, C 6.7 mg, D 14.5 mg, E 5.9 mg, F 23.4 mg, G 12.8 mg). The residue of fraction D was dissolved in EtOAc and then washed with a saturated solution of NaHCO3 to remove jasmonic acid [**9**, FIG. 1, 5.3 mg; *Rf*0.44 on TLC on silica gel eluted with CHCl3/*i*-PrOH (92:8, v/v)]. The organic phase was dried with Na2SO4 and evaporated under reduced pressure originating the amorphous solid (3*S*,4*R*,5*R*)-4-hydroxymethyl-3,5-dimethyldihydro-2-furanone [**3**, FIG. 1, 6.7 mg, *Rf*0.60 on TLC on silica gel eluted with CHCl3/*i*-PrOH (92:8, v/v)]. Fraction F was purified by preparative TLC on silica gel eluted with CHCl3/*i*-PrOH (9:1). Two more metabolites were obtained as amorphous solid and yellow oil, respectively, and identified as 3-indolecarboxylic acid [**8**, FIG. 1, 3.5 mg; *Rf*0.38 on TLC on silica gel eluted with CHCl3/*i*-PrOH (9:1)] and lasiolactols A and B [**1** and **2**, FIG. 1, 12.4 mg; *Rf*0.33 on TLC on silica gel eluted with CHCl3/*i*-PrOH (9:1)].

***Metabolite purification of strain LA-SOL3 grown at 37 °C.*** *—­­­­* The freeze-dried culture filtrate (from 1.6 L) was dissolved in 200 mL of ultrapure water and extracted with same volume of ethyl acetate as previously described for LA-SOL3 grown at 25 °C . The crude extract (LA-SOL3CE37, 432.7 mg), obtained as a brown oil, was fractionated by CC on silica gel (45 x 1.5 cm) eluted with CHCl3/*i*-PrOH (9:1, v/v) originating 9 homogeneous fractions (A 3.3 mg, B 4.3 mg, C 6.3 mg, D 5.6 mg, E 64.0 mg, F 18.3 mg, G 16.4 mg, H 102.3 mg, I 12.3 mg). The residue of fraction B, an amorphous solid, was identified as (*R*)-mellein (**10**, FIG. 1, *Rf*0.69 on TLC on silica gel eluted with CHCl3). The residue of fraction C, a yellow oil, was identified as (3*S*,4*S*)-4-acetyl-3-methyl-2-dihydrofuranone [**7**, FIG. 1, *Rf*0.85 on TLC on silica gel eluted withCHCl3/*i*-PrOH (95:5, v/v)], and the residue of fraction D, a yellow oil, was identified as (3*R*,4*S*)-4-acetyl-3-methyl-2-dihydrofuranone [**6**, FIG. 1, *Rf*0.84 on TLC on silica eluted withCHCl3/*i*-PrOH (95:5, v/v)]. Fraction E, after purification by preparative TLC on silica gel eluted with *n*-hexane/ethyl acetate (1:1, v/v), produced yellow oils identified as botryodiplodin (**4**, Figure 1, 22.3 mg *Rf*0.24) and 3-*epi-*botryodiplodin [**5**, FIG. 1, 16.8 mg *Rf*0.26 on TLC on silica gel eluted with *n*-hexane/ethyl acetate (1:1, v/v)]. The residue from fraction F was further purified by preparative TLC on silica gel eluted with CHCl3/*i*-PrOH (92:8, v/v), originating (3*S*,4*R*,5*R*)-4-hydroxymethyl-3,5-dimethyldihydro-2-furanone (**3**, FIG. 1, 13.4 mg) and an amorphous solid identified as tyrosol [**12**, FIG. 1, 3.2 mg, *Rf*0,52 on TLC on silica gel eluted with CHCl3-*i*-PrOH (92:8, v/v)]. The residue from fraction G, an amorphous solid, was identified as 3-indolecarboxylic acid. Finally, the fraction H, obtained as yellow oil, was identified as a mixture of lasiolactols A and B (**1** and **2**, Figure 1).

***Metabolite purification of strain LA-SV1 grown at 25 °C.*** *—­­­­* The freeze-dried culture filtrates (from 2.5 L) were dissolved in 250 mL of ultrapure water and extracted with same volume of ethyl acetate, as previously described for LA-SOL3 grown at 25 °C. The crude extract (LA-SV1CE25, 413.9 mg), obtained as brown oil residue, was submitted to fractionation by CC (45 x 1.5 cm) on silica gel eluted with CHCl3/*i*-PrOH (9:1, v/v) originating 8 fractions (A 10.3 mg, B 5.5 mg, C 15.2 mg, D 6.1 mg, E 135.1 mg, F 36.5 mg, G 185.5 mg, and H 9.1 mg). The residue from fraction A was further purified by preparative TLC on silica gel eluted with CHCl3 and identified as (*R*)-mellein (**10**, FIG. 1, 2.0 mg). The residue of fraction B was identified as (3*S*,4*S*)-4-acetyl-3-methyl-2-dihydrofuranone (**7**, FIG. 1). The residue of fraction C was purified by preparative TLC on silica gel eluted with a mixture of *n*-hexane/EtOAc (1:1, v/v), originating an amorphous solid identified as *cis*-(3*R*,4*R*)-4-hydroxymellein [**11**, FIG. 1, 3.2 mg *Rf*0.45 on TLC on silica gel eluted with *n*-hexane/ethyl acetate (1:1, v/v)]. The residue of fraction E (30.5 mg) was dissolved in ethyl acetate and then washed with a saturated solution of NaHCO3 to remove jasmonic acid (7.5 mg). The organic phase was dried with Na2SO4 and evaporated under reduced pressure giving **3** (Figure 1, 12.4 mg). The residue of fraction F was identified as jasmonic acid. Finally, the residue of fraction G (yellow oil) was obtained and identified as a mixture of lasiolactols A and B.

***Metabolite purification of strain LA-SV1 grown at 37 °C.*** *—­­­­* The freeze-dried culture filtrate (from 1.0 L) was dissolved in 200 mL of ultrapure water and extracted with the same volume of ethyl acetate as previously reported for LA-SOL3 grown at 25 °C. The crude extract (LA-SV1CE37, 524.4 mg), obtained as brown oil, was fractionated by CC (45 x 1.5 cm) on silica gel, eluted with CHCl3/*i*-PrOH 9:1 (v/v), originating 11 fractions (A 2.8 mg, B 11.6 mg, C 13.6 mg, D 22.5 mg, E 116.0 mg, F 35.4 mg, G 47.1 mg, H 7.4 mg, I 33.5 mg, L 113.8 mg, and M 9.6 mg). The residue of fraction B was identified as (*R*)-mellein. The residue of fraction C was identified as (3*S*,4*S*)-4-acetil-3-methyl-2-dihydrofuranone (**7**, FIG. 1). Part of the residue of fraction E (37.4 mg) was further purified by preparative TLC on silica gel eluted with *n*-hexane/ethyl acetate 1:1, v/v (three times) originating (-)-botryodiplodin and 3-*epi*-botryodiplodin (7.4 and 8.3 mg, respectively). The residue of fraction F was identified as 3-indolecarboxylic acid. Finally, the residue of fraction L, yellow oil, was identified as a mixture of lasiolactols A and B.

***Lasiolactol A (****1****).*** *–* 1H NMR (400 MHz, in CDCl3,): δ 5.08 (s, H-2), 4.22 (quint *J* = 6.3, H-5), 3.85-3.66 (m, H2-8), 2.11 (ddq, J=6.0, 7.2, 8.5 , H-3), 1.63 (brs,OH), 1.61-1.56 (m, H-4), 1.35 (d, *J* = 6.3 Hz, H3-6), 1.15 (3H, d, *J =* 7.2, H3-7). *Lasiolactol B (****2****).* 1H NMR (400 MHz, in CDCl3,): δ 5.26 (d, 4.0, H-2), 4.02 (dq *J* = 6.3, 8.2, H-5), 3.85-3.66 (m, H2-8), 2.05 (ddq, *J*=6.0, 7.2, 8.5 H-3), 1.86-1.79 (m, H-4), 1.63 (brs,OH), 1.41 (d, *J* = 6.3, H3-6), 1.08 (3H, d, *J=*7.2, H3-7). 1H NMR spectrum was similar to data previously reported (Andolfi et al*.*, 2016). ESI MS(+) *m/z*: 313 [M+K]+, 297 [M+Na]+.

***(3S,4*R*,5*R*)-4-Hydroxymethyl-3,5-dimethyldihydro-2-furanone (****3****).***—[]D25 -21 (*c* =0.5) [Optical rotation was very similar to that previously reported (Andolfi *et al*., 2014)]; 1H NMR (400 MHz, in CDCl3,): δ 4.39 (dq *J*=6.2, 9.4, H-5), 3.83 (dd, *J*=4.0, 10.8, H-8), 3.75 (dd, *J*=5.4, 10.8, H-8) 2.60 (dq, *J*=7.1, 11.5, H-3), 1.87 (m, H-4), 1.46 (3H, d, *J*=6.2, H3-6), 1.28 (d, *J=*7.1, H3-7). 1H NMR spectrum was similar to data previously reported (Ravi et al*.*, 1979); ESIMS (+) *m/z*: 167 [M + Na]+.

***(-)-Botryodiplodin (****4****).***— [α]25D -62 (c 0.3, CHCl3); 1H NMR (CDCl3, 400 MHz) δ 5.22-5.18 (m, H-2 and H-2’), 4.86 (d, *J*=12.0, OH′), 4.31 (t, *J*=8.8, H5), 4.12-4.02 (m, H5 and H5′), 3.69 (q, *J*=7.1, H4′), 3.44 (dt, *J*=2.7, 7.7, H4), 2.63 (quint, *J*=7.1, H3), 2.51-2.46 (m, H3′), 2.32 (s, H3-8), 2.23 (s, H3-8’), 1.09 (d, *J*=7.2, H3-6), 0.89 (d, *J*=7.2, H3-6). Optical rotation and 1H NMR spectrum were similar to data previously reported (Ramezani et al*.*, 2007). ESI MS(+) *m/z*: 167 [M+Na]+.

***(2*R*/2*S*,3*S*,4*S*)-3-epi-Botryodiplodin (*5*).*—**[]D25 +75 (CHCl3, *c* 0.7) [Optical rotation was very similar to that previously reported (Rehnberg and Magnusson, 1990)] ; 1H and 13C NMR (CDCl3) see Table 1; HR-ESI-MS (+) spectrum *m/z*: 167.0660 [C7H12NaO3, calcd. 167.0684, M+Na]+.

***(3*R*,4*S*)-4-Acetyl-3-methyl-2-dihydrofuranone (****6****).****—*[α]25D -11.2 (c 0.3, CH3OH), 1H NMR (400 MHz, CDCl3) 4.55 (dd, *J*=6.2, 9.6, H-5), 4.31 (dd, *J*=6.9, 9.6, H-5), 3.63 (*ddd*, *J*=6.2, 6.9, 8.8, H-4), 2.98 (dq, *J*=7.5, 8.8, H-3), 2.26 (s, H3-8), 1.24 (*d*, *J*=7.5, H3-6).Optical rotation and 1H NMR spectrum were similar to data previously reported (Forzato et al., 2005). ESI MS(+) *m/z*: 165 [M+Na]+.

***(3*S*,4*S*)-4-Acetyl-3-methyl-2(3H)-dihydrofuranone (****7****)***.—[α]25D -68 (c 0.4, CH3OH); 1H NMR (CDCl3) 4.50 (t, *J*=8.8, H-5), 4.22 (t, *J*=9.3, H-5), 3.27 (q, *J*=9.4, H-4), 2.87 (dq, *J*=7.0, 10.2, H-3), 2.28 (s, H3-8), 1.38 (d, *J*=7.0, H3-6). Optical rotation and 1H NMR spectrum were similar to data previously reported (Forzato et al., 2005). ESI MS(+) *m/z*: 165 [M+Na]+.

***(-)-Jasmonic acid (****9****).****—* []D25 -68 (*c* = 0.3, CH3OH) [optical rotation was very similar to that reported (Aldridge *et al.*, 1971)].  1H NMR (CDCl3): 5.49-5.44 (m, H-10), 5.28-5.24 (m, H-9), 2.78 (d, *J*=8.9, H-4), 2.41-2.25 (m, H-4, H-5, H-6 and H2-8,), 2.14 (dd, *J*=8.0 and 19.9, H-1), 2.06 (dd, *J*=7.4 and 7.4, H2-11), 1.92 (m, H-2), 1.53 (m, H-5), 0.96 (t, J=7.3, H3-12). 1H NMR spectrum was similar to data previously reported (Carvajal et al., 2011). ESIMS (+) *m/z*: 233 [M + Na]+.

***(*R*)-Mellein (****10****).***— α]25D -95 (c 0.5, CH3OH) [Optical rotation was very similar to that previously reported (Cabras et al., 2006)]; 1H NMR (CDCl3) δ: 11.03 (s, OH-8), 7.41 (t, *J*=8.0, H-6), 6.89 (d, *J*=8.0, H-5), 6.69 (d, *J*=8.0, H-7), 4.78-4.69 (m, H-3), 2.93 (d, *J*=7.2, H2-4), 1.53 (d, *J*=6.2, 3-CH3). 1H NMR spectrum was similar to data previously reported (Dimitriadis et al., 2005). ESIMS (+) *m/z*: 217 [M + Na]+, 195 [M + H]+.

***(3*R*,4*R*)-hydroxymellein (****11****).***—[α]25D -42 (c 0.4, CH3OH) [Optical rotation was very similar to that previously reported (Cabras et al., 2006)]; 1H NMR (CD3OD) δ: 11.06 (*s*, OH-8), 7.56 (dd, *J*=1.1, 7.3, H-6), 7.08 (dd, *J*=1.1, 7.3, H-5), 7.00 (br*d*, *J*=7.3, H-7), 4.73 (*dq*, *J*=6.6, 1.8, H-3), 4.61 (brd, *J*=1.8), 1.62 (*d*, *J*=6.6, 3-CH3). 1H NMR spectrum was similar to data previously reported (Aldridge et al., 1971). ESIMS (+) *m/z*: 217 [M + Na]+, 195 [M + H]+.

***Tyrosol (****12****).***– 1H NMR (CD3OD) δ: 7.03 (*d*, *J*=8.2 Hz, H-3 e H-5), 6.70 (*d, J*=8.2 HzH-2 andH-6), 3.67 (*t, J*=7.2 Hz, H-8), 2,70 (*t, J*=7.2 Hz, H-7). 1H NMR spectrum was similar to data previously reported (Capasso et al*.*, 1992). ESIMS (+) *m/z*: 295 [2M + Na]+, 159 [M + Na]+.

***Acetylation of botryodiplodin.*** *—­­­­* (3*R*,4*S*)-Botryodiplodin (5.3 mg) was acetylated with pyridine (30 μL) and Ac2O (30 μL) in the same conditions above reported to convert **3** in the corresponding 8-*O*-acetyl derivative. Also, the reaction work-up is the same and the residue was purified by TLC on silica gel, eluent *n*-hexane-ethyl acetate (1:1, v/v), originating (2*R*,3*R*,4*S*)-botryodiplodin acetate (**14**, 4.3 mg, R*f* 0.56), whose physic and spectroscopic data were comparable to those previously reported (Moreau *et al*., 1982). Botryodiplodin acetate (**14**): 1H NMR (CDCl3, 400 MHz) δ 6.00 (brs, H-2), 4.38 (t, *J*=9.0 Hz, H5), 4.12 (t, *J*=9.0 Hz, H5), 3.63-3.57 (m, *J* =7.1 Hz, H4), 2.71 (quint, *J*=7.0 Hz, H3), 2.25 (s, COCH3), 2.08 (s, H3-8); 0.96 (d, *J* =7.3 Hz, H3-6); ESIMS (+) *m/z*: 209 [M +Na]+.

**References**

Aldridge DC, Galt S, Giles D, Turner WB. 1971. Metabolites of *Lasiodiplodia theobromae*. Journal of the Chemical Society C 1623–1627.

Andolfi A, Basso S, Giambra S, Conigliano G, Lo Piccolo S, Alves A, Burruano S. 2016. Lasiolactols A and B produced by the grapevine fungal pathogen *Lasiodiplodia mediterranea*. Chemistry & Biodiversity 13:395−402.

Andolfi A, Maddau L, Cimmino A, Linaldeddu BT, Basso S, Deidda A, Serra S, Evidente A. 2014. Lasiojasmonates A–C, three jasmonic acid esters produced by *Lasiodiplodia* sp., a grapevine pathogen. Phytochemistry 103:145–153.

Cabras A, Mannoni MA, Serra S, Andolfi A, Fiore M, Evidente A. 2006. Occurrence, isolation and biological activity of phytotoxic metabolites produced in vitro by *Sphaeropsis sapinea*, pathogenic fungus of Pinus radiata. European Journal of Plant Pathology 115:187−193.

Capasso R, Cristinzio G, Evidente A, Scognamiglio F. 1992. Isolation, spectroscopy and selective phytotoxic effects of polyphenols from vegetable waste waters. Phytochemistry 31:4125–4128.

Carvajal M, Espinoza L, Caggia S, Cardile V, Garbarino JA, Peña-Cortés H, Russo A. 2011. New stereoisomeric derivatives of jasmonic acid generated by biotransformation with the fungus *Gibberella fujikuroi* affect the viability of human cancer cells. Electronic Journal of Biotechnology 14:7–7.

Dimitriadis C, Gill M, Harte MF. 1997. The first stereospecific approach to both enantiomers of mellein. Tetrahedron: Asymmetry 8:2153–2158.

Forzato C, Furlan G, Nitti P, Pitacco G, Marchesan D, Coriani S, Valentin E. 2005. A combined experimental and computational strategy in the assignment of absolute configurations of 4-methyl-5-oxo-tetrahydrofuran-3-carboxylic acids and their esters. Tetrahedron: Asymmetry 16:3011−3023.

Moreau S, Lablache-Combier A, Biguet J, Foulon C, Delfosse M. 1982. Botryodiplodin, a mycotoxin synthesized by a strain of *P. roqueforti.* The Journal of Organic Chemistry 47:2358–2359.

Ramezani M, Shier WT, Abbas H K, Tonos JL, Baird RE, Sciumbato GL. 2007. Soybean charcoal rot disease fungus *Macrophomina phaseolina* in Mississippi produces the phytotoxin (−)-botryodiplodin but no detectable phaseolinone. Journal of Natural Products 70:128–129.

Ravi BN, Armstrong RW, Faulkner DJ. 1979. Some aromatic compounds from the marine sponge *Plakortis halichondrioides*. The Journal of Organic Chemistry 44:3109–3113.

Rehnberg, N., Magnusson, G. 1990. Total synthesis of (-)-and (+)-botryodiplodin and (+)-and (-)-epibotryodiplodin. Acta Chemica Scandinavica 44:377–383.

**Figure legend**

**Figure S1.** 1H NMR spectrum of lasiolactols (1-2) recorded at 400 MHz in CDCl3

**Figure S2**. 1H NMR spectrum of (3*S*,4*R*,5*R*)-4-hydroxymethyl-3,5-dimethyldihydro-2-furanone (**3**) recorded at 400 MHz in CDCl3

**Figure S3**. 1H NMR spectrum of (-)-botryodiplodin (**4**) recorded at 400 MHz in CDCl3

**Figure S4**. 1H NMR spectrum of (3*R*,4*S*)-4-acetyl-3-methyl-2-dihydrofuranone (**6**) recorded at 400 MHz in CDCl3

**Figure S5**. 1H NMR spectrum of (3*S*,4*S*)-4-acetyl-3-methyl-2-dihydrofuranone (**7**) recorded at 400 MHz in CDCl3

**Figure S6**. 1H NMR spectrum of (-)-jasmonic acid (**9**) recorded at 400 MHz in CDCl3

**Figure S7**. 1H NMR spectrum of (*R*)-mellein (**10**) recorded at 400 MHz in CDCl3

**Figure S8**. 1H NMR spectrum of (3*R, 4R*)-4-hydoxymellein (**11**) recorded at 400 MHz in CDCl3

**Figure S9.** 1H NMR spectrum of tyrosol (**12**) recorded at 400 MHz in CDCl3

**Figure S10.** 1H NMR spectrum of (2*R*/2*S*-3*S*,4*S*)-3-*epi*-botryodiplodin recorded in CDCl3 at 400 MHz

**Figure S11.** HSQC spectrum of (2*R*/2*S*-3*S*,4*S*)-3-*epi*-botryodiplodin (**5**) recorded at 400 MHz in CDCl3

**Figure S12**. 13C NMR spectrum of (2*R*/2*S*-3*S*,4*S*)-3-*epi*-botryodiplodin (**5**) recorded at 100 MHz in CDCl3

**Figure S13.** 1H, 1H COSY spectrum of (2*R*/2*S*-3*S*,4*S*)-3-*epi*-botryodiplodin (**5**) recorded at 400 MHz in CDCl3

**Figure S14.** HMBC spectrum of (2*R*/2*S*-3*S*,4*S*)-3-*epi*-botryodiplodin (**5**) recorded at 400 MHz in CDCl3

**Figure S15**. NOESY spectrum of (2*R*/2*S*-3*S*,4*S*)-3-*epi*-botryodiplodin (**5**) recorded at 400 MHz in CDCl3

**Figure S16.** 1H NMR spectrum of (2*R*,3*S*,4*S*)- 3-*epi*-botryodiplodin acetate (**16**) recorded in CDCl3 at 400 MHz

**Figure S17**. 1H, 1H COSY spectrum of (2*R*,3*S*,4*S*)-3-*epi*-botryodiplodin acetate (**16**) recorded at 400 MHz in CDCl3

**Figure S18**. 13C NMR spectrum of (2*R*,3*S*,4*S*)- 3-*epi*-botryodiplodin acetate (**16**) recorded at 100 MHz in CDCl3

**Figure S19.** 1H NMR spectrum of (2S,3*S*,4*S*)-*epi*-botryodiplodin acetate (**15**) recorded in CDCl3 at 400 MHz

**Figure 20.** 1H, 1H COSY spectrum of (2*S*,3*S*,4*S*)-*epi*-botryodiplodin acetate (**15**) recorded at 400 MHz in CDCl3

**Figure S21**. 13C NMR spectrum of (2*S*,3*S*,4*S*)- 3-*epi*-botryodiplodin acetate (**15**) recorded at 100 MHz in CDCl3

**Figure S22.** 1H NMR spectrum of (2*S*,3*R*,4*S*)-botryodiplodin acetate (**14**) recorded at 400 MHz in CDCl3

**Table S1.** GC-MS analysis of the identified metabolites. Compounds that were not present in the custom GC-MS library are presented in bold.

| Compound | Code | RI* | Derivative | | Diagnostic ions *m/z* (abundance) | |
| --- | --- | --- | --- | --- | --- | --- |
| 4-acetyl-3-methyl-2-dihydrofuranones.TMS | **6-7** | 1115 |  | | 199 [M-Me]+ (31), 155 [M-Me-CO2]+ (100), 155 [M-Me-CO2-CH2]+ (1), 73 [TMS]+ (100) | |
| (3*S*,4*R*,5*R*)-4-hydroxymethyl-3,5-dimethyldihydro-2-furanone.TMS | **3** | 1255 |  | | 201 [M-Me]+ (16), 183 [M-Me-H2O]+ (2), 171 [M-2Me]+ (90), 157 [M-2Me-CH2]+ (10), 143 [M-TMS]+ (8), 129 [M-TMS-CH2]+ (17), 73 [TMS]+ (100) | |
| **lasiolactols. 2TMS** | **1-2** | 1325 |  | | 289 [M]+(1), 275[M-Me]+(1), 259[M-2Me]+(1), 217 [M-TMS]+(2), 200 [M-OTMS]+(6), 143 [M-2TMS]+(91) | |
| **botryodiplodin/*epi*-botryodiplodin. TMS** | **4-5** | 1282 |  | | 216[M]+(5), 201[M-Me]+(20), 143[M-TMS]+(25), 171[M-C3H9]+(70), 127[M-OTMS]+(4), 100[M-TMS-CH3CO]+(3) | |
| **botryodiplodin/*epi*-botriodiplodin. 2TMS** | **4-5** | 1403 |  | | 287[M-H]+(15), 273[M-Me]+(13), 199[M-OTMS]+ (15), 157[M-OTMS-C3H6]+(45), 142[M-2TMS]+(65) | |
| **mellein. TMS** | **10** | 1877 |  | | 235[M-Me]+ (95) | |
| tyrosol. 2TMS | **12** | 1575 |  | 282 [M]+(19), 267 [M-Me]+(13), 193 [M-OTMS]+(13), 179 [M-OTMS-CH2]+(100), 103 [M-2OTMS]+(10) | |
| jasmonic acid. TMS | **9** | 1521 |  | | 282 [M]+ (31), 267 [M-Me]+ (2), 151 [M-TMS-CO2-CH2]+ (53), 133 [M-TMS-CO2-CH2-H2O]+ (39), 109 [M-TMS-CO2-CH2-C3H6]+ (20), 96 [M-TMS-CO2-CH2- C4H7]+ (24), 73 [TMS]+ (100) | |
| jasmonic acid. 2TMS | **9** | 1542 |  | | 354 [M]+ (20), 339 [M-Me]+ (47), 237 [M-TMS-CO2]+ (1), 223 [M-TMS-CO2-CH2]+ (100), 154 [M-TMS-CO2-CH2-C5H9]+ (28), 73 [TMS]+ (96) | |
| 3-ICA. TMS | **8** | 1608 |  | | 233 [M]+ (39), 218 [M-Me]+ (47), 174 [M-Me-CO2]+ (100), 144 [M-3Me-CO2]+ (57), 116 [M-TMS-CO2]+ (19), 73 [TMS]+ (1) | |
| 3-ICA.2TMS | **8** | 1618 |  | | 305 [M]+ (57), 290 [M-Me]+ (47), 246 [M-Me-CO2]+ (100), 216 [M-3Me-CO2]+ (57), 73 [TMS]+ (71) | |
| 4-hydroxymellein. 2TMS | **11** | 2093 |  | | 323 [M-Me]+ (100), 265 [M-TMS]+ (14), 249 [M-OTMS]+ (2), 233 [M-OTMS-Me]+ (48), 205 [M-OTMS-Me-CO]+ (17), 73 [TMS]+ (50) | |

*RI stands for Retention Index

**Figure S1.** 1H NMR spectrum of lasiolactols (**1-2**) recorded at 400 MHz in CDCl3

**Figure S2**. 1H NMR spectrum of (3*S*,4*R*,5*R*)-4-hydroxymethyl-3,5-dimethyldihydro-2-furanone (**3**) recorded at 400 MHz in CDCl3


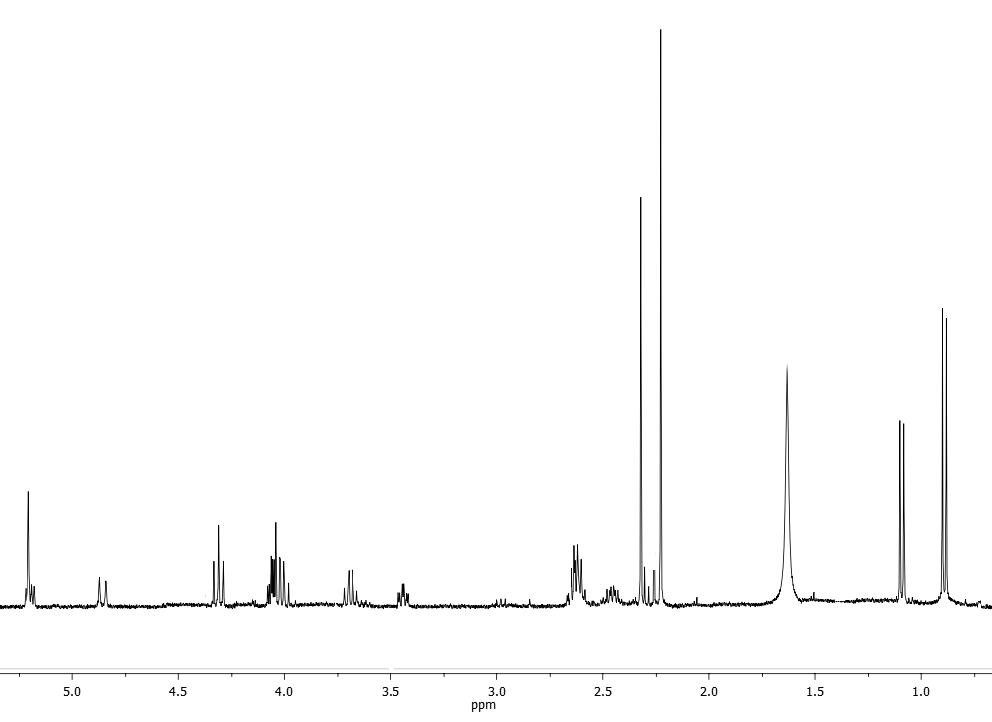


**Figure S3**. 1H NMR spectrum of (-)-botryodiplodin (**4**) recorded at 400 MHz in CDCl3


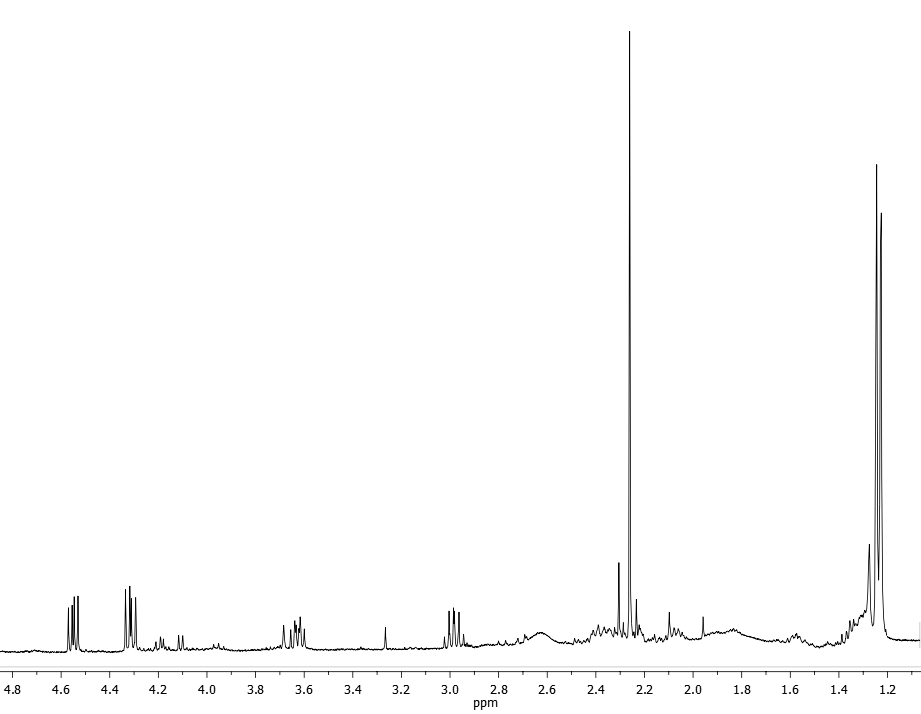


**Figure S4**. 1H NMR spectrum of (3*R*,4*S*)-4-acetyl-3-methyl-2-dihydrofuranone (**6**) recorded at 400 MHz in CDCl3


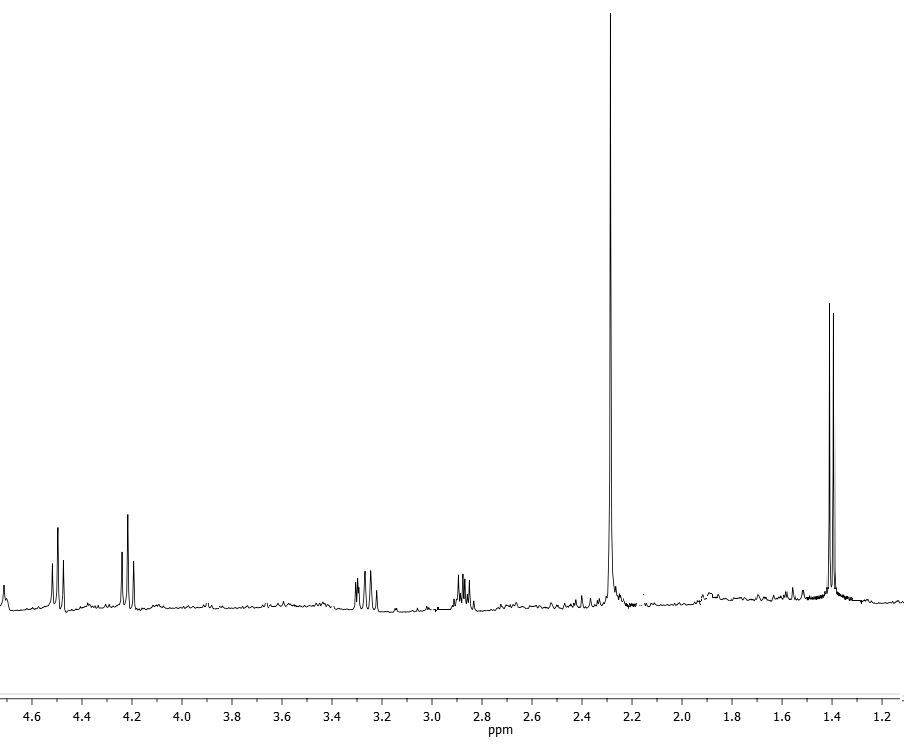


**Figure S5**. 1H NMR spectrum of (3*S*,4*S*)-4-acetyl-3-methyl-2-dihydrofuranone (**7**) recorded at 400 MHz in CDCl3

**Figure S6**. 1H NMR spectrum of (-)-jasmonic acid (**9**) recorded at 400 MHz in CDCl3

**Figure S7**. 1H NMR spectrum of (*R*)-mellein (**10**) recorded at 400 MHz in CDCl3

**Figure S8**. 1H NMR spectrum of (3*R, 4R*)-4-hydoxymellein (**11**) recorded at 400 MHz in CDCl3

**Figure S9.** 1H NMR spectrum of tyrosol (**12**) recorded at 400 MHz in CDCl3

**Figure S10.** 1H NMR spectrum of (2*R*/2*S*-3*S*,4*S*)-3-*epi*-botryodiplodin recorded in CDCl3 at 400 MHz


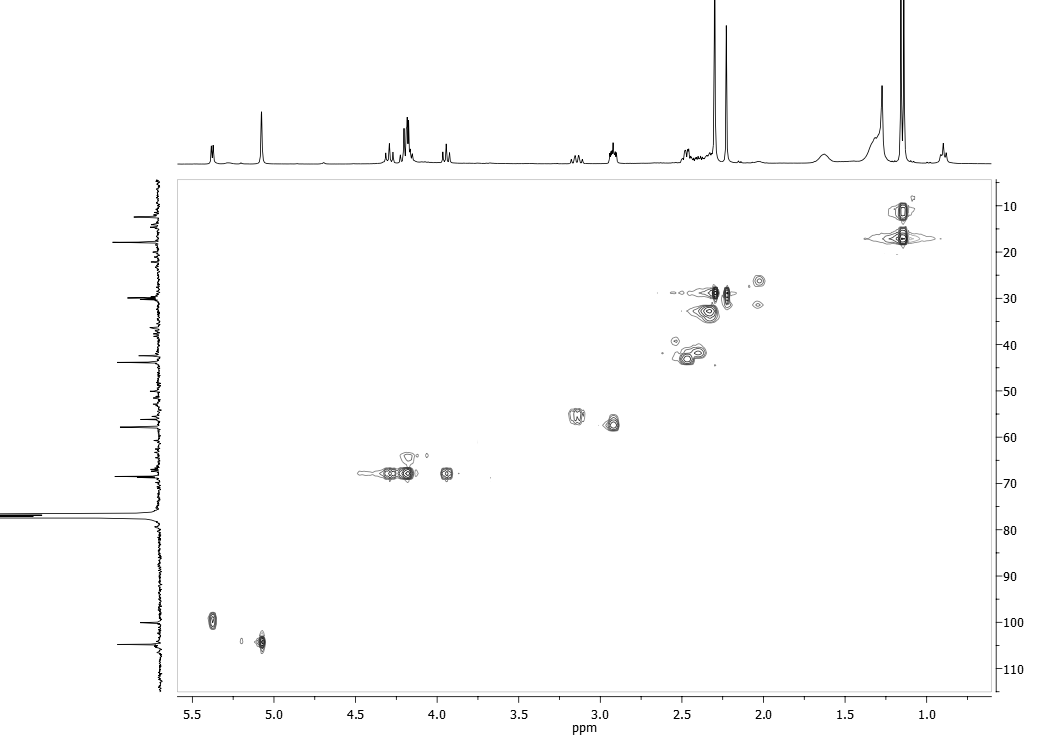


**Figure S11.** HSQC spectrum of (2*R*/2*S*-3*S*,4*S*)-3-*epi*-botryodiplodin (**5**) recorded at 400 MHz in CDCl3

**Figure S12**. 13C NMR spectrum of (2*R*/2*S*-3*S*,4*S*)-3-*epi*-botryodiplodin (**5**) recorded at 100 MHz in CDCl3

**Figure S13.** 1H, 1H COSY spectrum of (2*R*/2*S*-3*S*,4*S*)-3-*epi*-botryodiplodin (**5**) recorded at 400 MHz in CDCl3

**Figure S14.** HMBC spectrum of (2*R*/2*S*-3*S*,4*S*)-3-*epi*-botryodiplodin (**5**) recorded at 400 MHz in CDCl3

**Figure S15**. NOESY spectrum of (2*R*/2*S*-3*S*,4*S*)-3-*epi*-botryodiplodin (**5**) recorded at 400 MHz in CDCl3

**Figure S16.** 1H NMR spectrum of (2*R*,3*S*,4*S*)-3-*epi*-botryodiplodin acetate (**16**) recorded in CDCl3 at 400 MHz


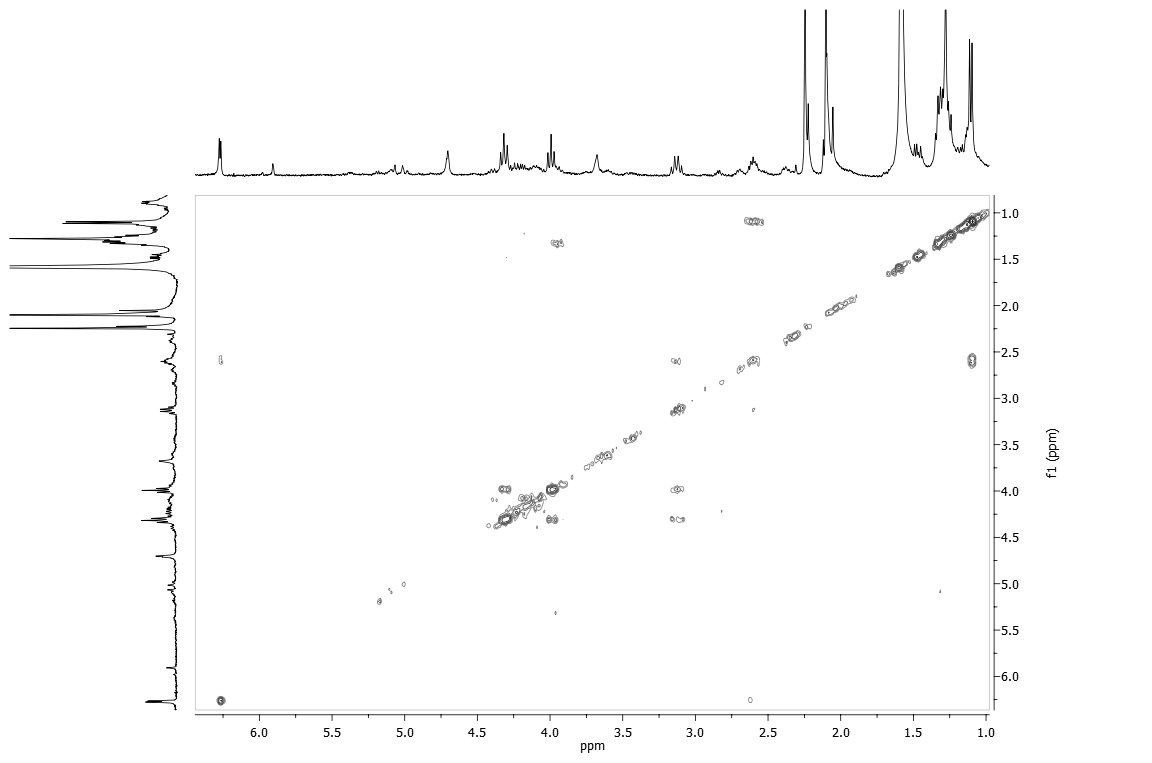


**Figure S17**. 1H, 1H COSY spectrum of (2*R*,3*S*,4*S*)-3-*epi*-botryodiplodin acetate (**16**) recorded at 400 MHz in CDCl3


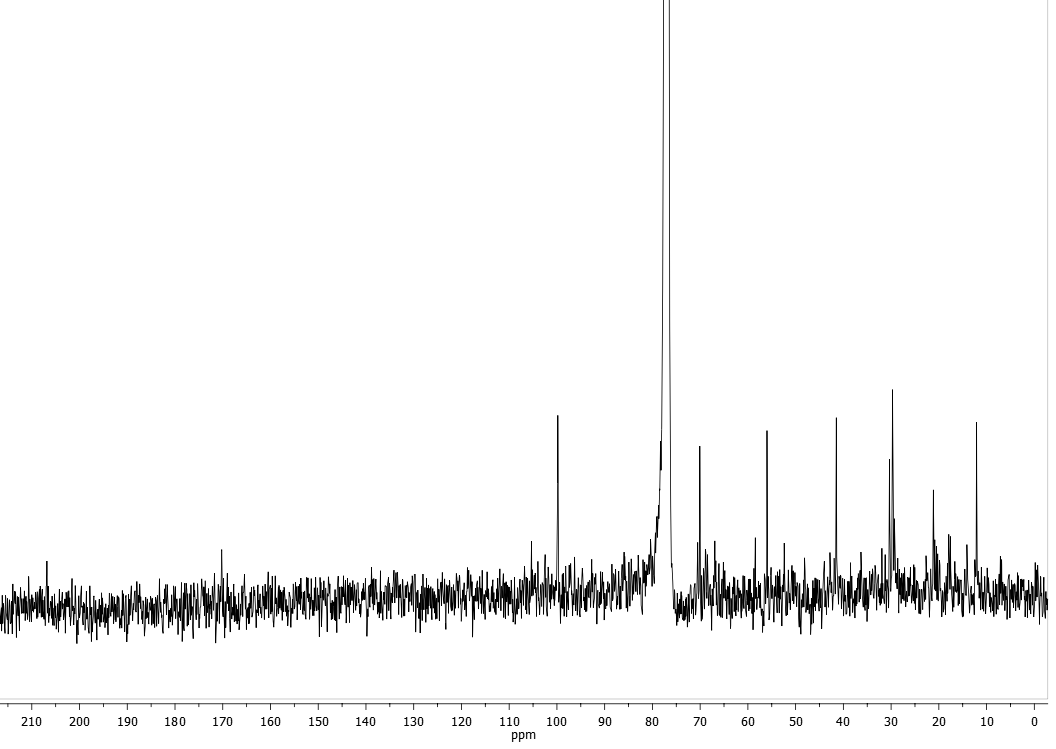


**Figure S18**. 13C NMR spectrum of (2*R*,3*S*,4*S*)-3-*epi*-botryodiplodin acetate (**16**) recorded at 100 MHz in CDCl3

**Figure S19.** 1H NMR spectrum of (2S,3*S*,4*S*)-*epi*-botryodiplodin acetate (**15**) recorded in CDCl3 at 400 MHz


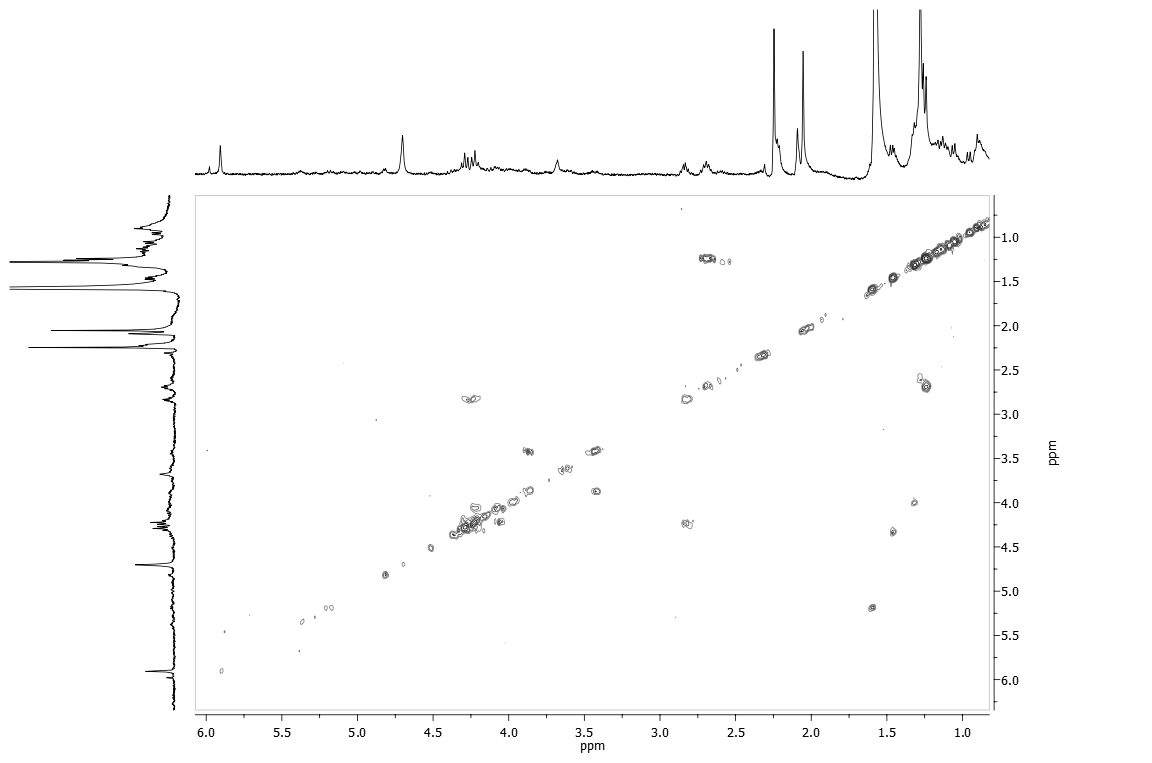


**Figure 20.** 1H, 1H COSY spectrum of (2*S*,3*S*,4*S*)-*epi*-botryodiplodin acetate (**15**) recorded at 400 MHz in CDCl3


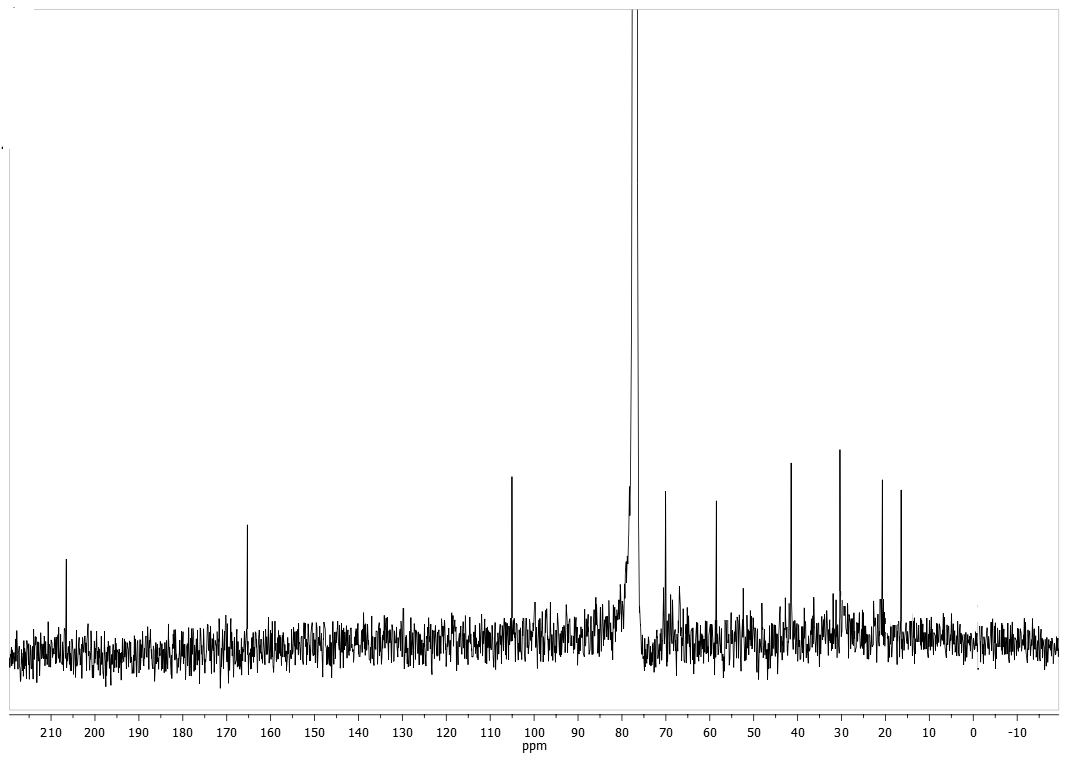


**Figure S21**. 13C NMR spectrum of (2*S*,3*S*,4*S*)-3-*epi*-botryodiplodin acetate (**15**) recorded at 100 MHz in CDCl3


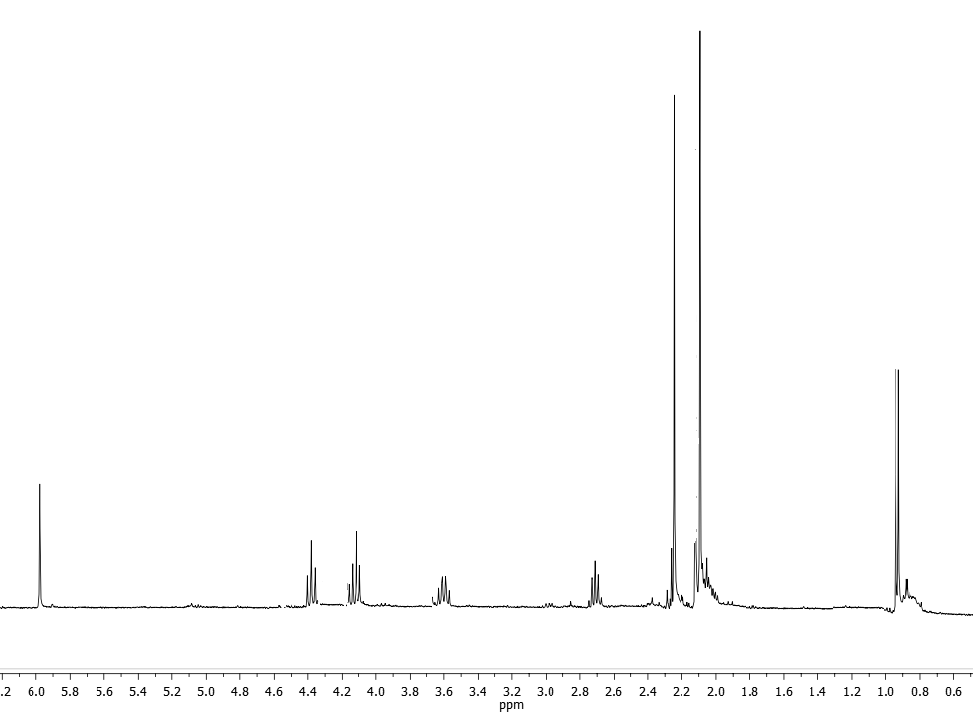


**Figure S22.** 1H NMR spectrum of (2*S*,3*R*,4*S*)-botryodiplodin acetate (**14**) recorded at 400 MHz in CDCl3
